# Supplementary material for: A hybrid MD-kMC algorithm for folding proteins in explicit solvent
Source: Royal Society of Chemistry journal article supplement (doi:10.1039/c3cp55251a), 2014-01-01
Supplement: c3cp55251a.pdf [file c3cp55251a.pdf]

# A hybrid MD-KMC algorithm for folding proteins in explicit solvent - Supplementary information<sup>†</sup>

Emanuel Karl Peter,<sup>\*a</sup> Joan-Emma Shea,<sup>a‡</sup>

<sup>a‡</sup>University of California Santa Barbara, Department of Chemistry and Biochemistry, Department of Physics, Santa Barbara, CA 93106, USA; E-mail: [shea@chem.ucsb.edu](mailto:shea@chem.ucsb.edu)

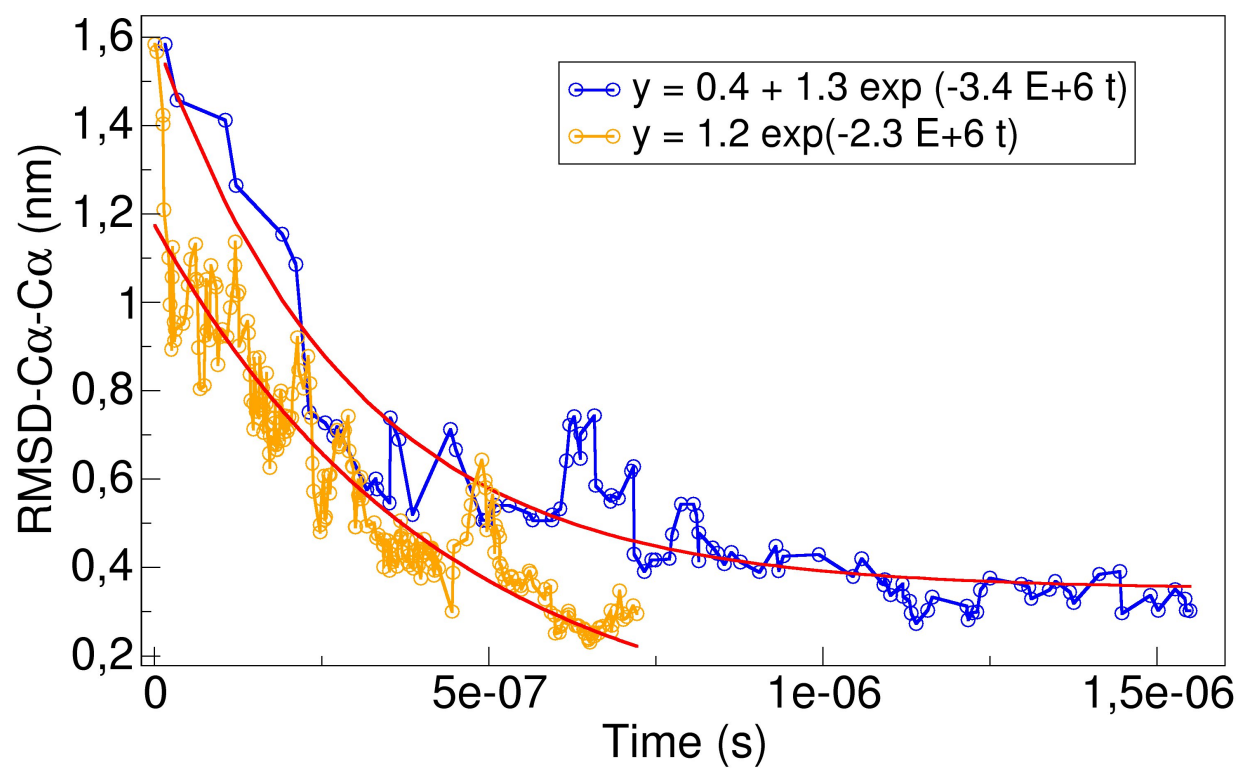

**Fig. 1S** Single exponential fit of the  $RMSD_{C\alpha-C\alpha}$  as function of simulation time for two trajectories from *Method<sub>a</sub>*.

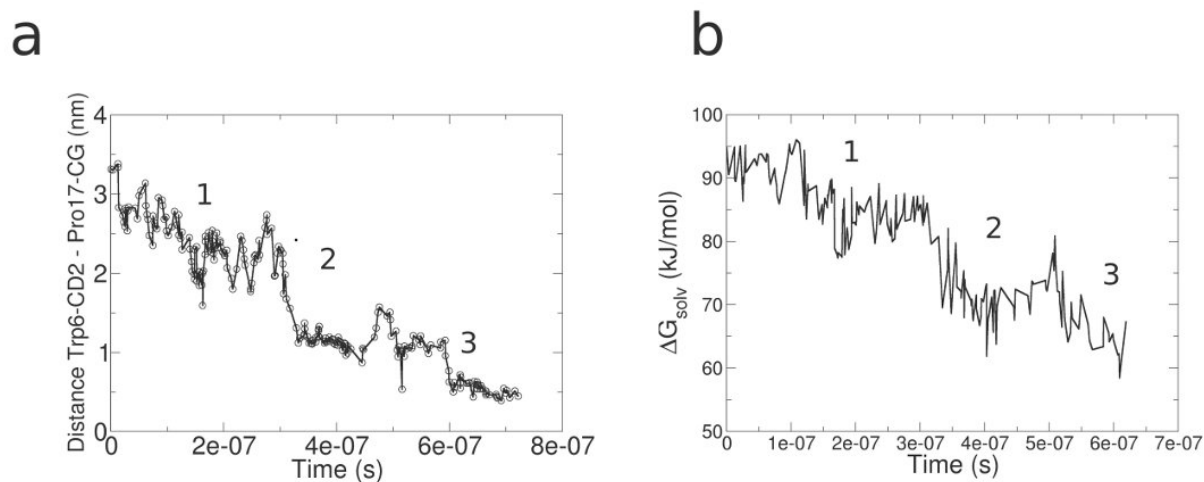

**Fig. 2S** Distance between atoms Trp6-CD2 and Pro17-CD as function of simulation time (a). Solvation free energy of TrpCage as function of simulation time (b). The numbers 1, 2, 3 indicate the different primary structures visited during the folding process of TrpCage. These structures are shown in the main body of the text in figure 3.

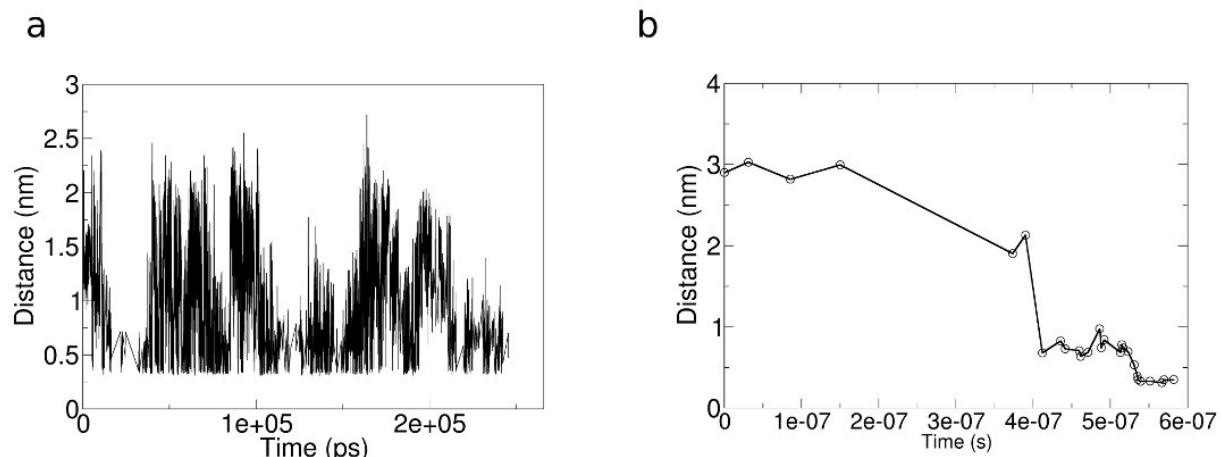

**Fig. 3S** Distance between Asp9-OD1 and Arg16-CZ as a measure for the stability of the Asp9-Arg16 salt-bridge in implicit solvent (a) and in explicit solvent (b).

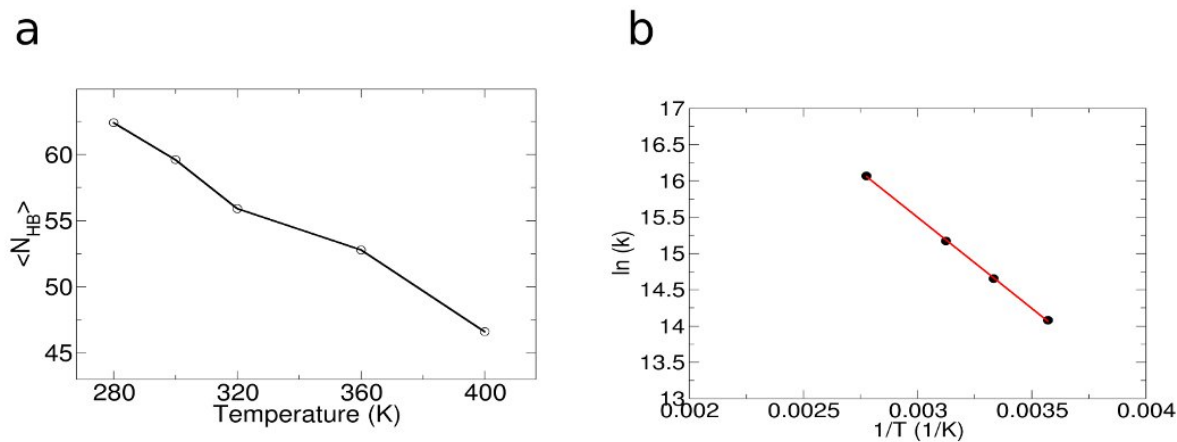

**Fig. 4S** Average number of H-bonds as a function of reciprocal simulation temperature (a). Folding rate constant as function of temperature (b), using *Method<sub>a</sub>*.

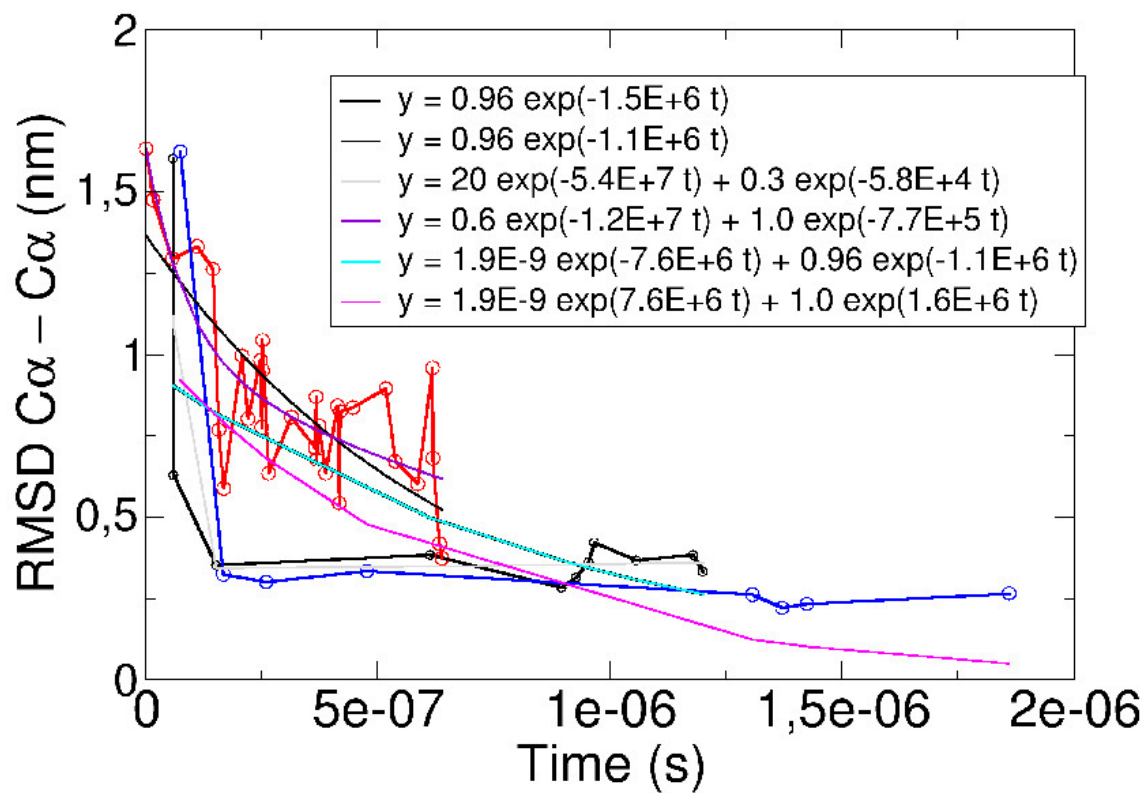

**Fig. 5S** Single and double exponential fit of the  $RMSD_{C\alpha-C\alpha}$  as function of simulation time of 2 simulations using *Method<sub>b</sub>*. Neither fits the trajectories well.

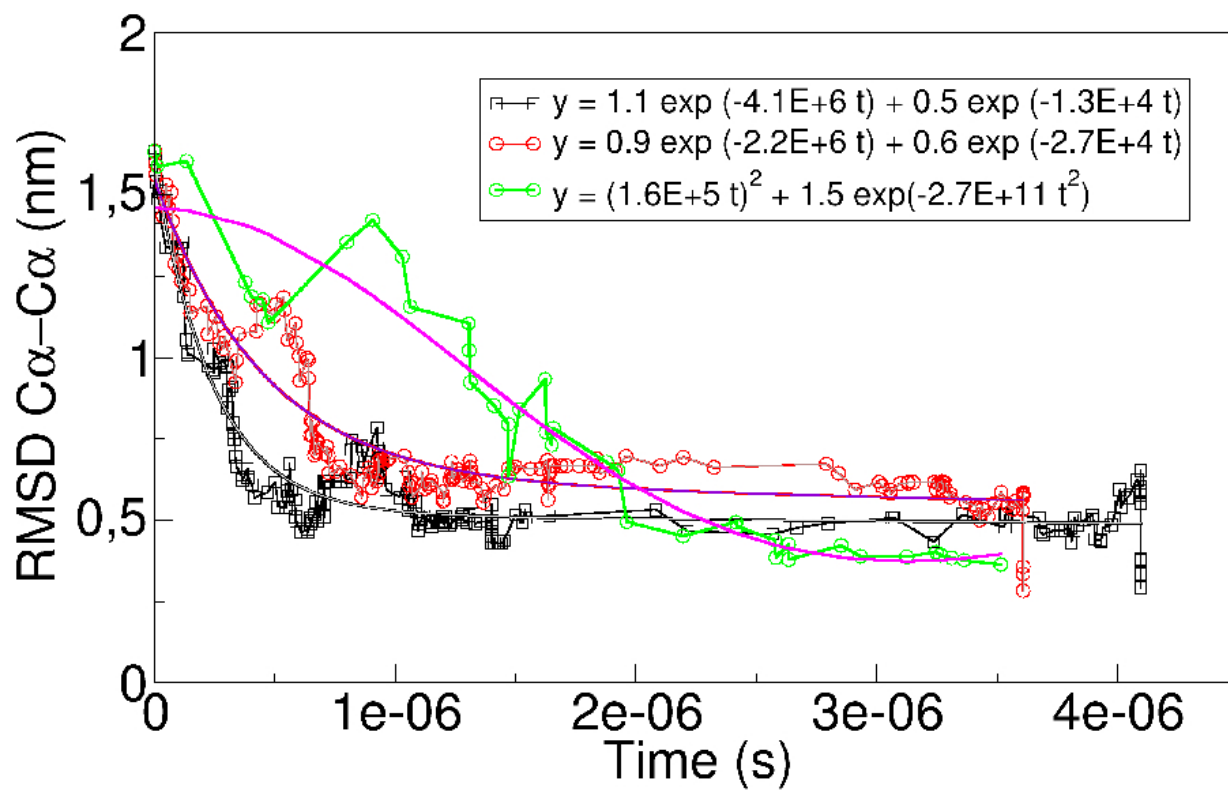

**Fig. 6S** Single and double exponential fits on the  $RMSD_{C\alpha-C\alpha}$  as function of simulation time of 3 simulations using *Method<sub>c</sub>*. We observe one fast component, corresponding to the collapse of the peptide and one very slow component.

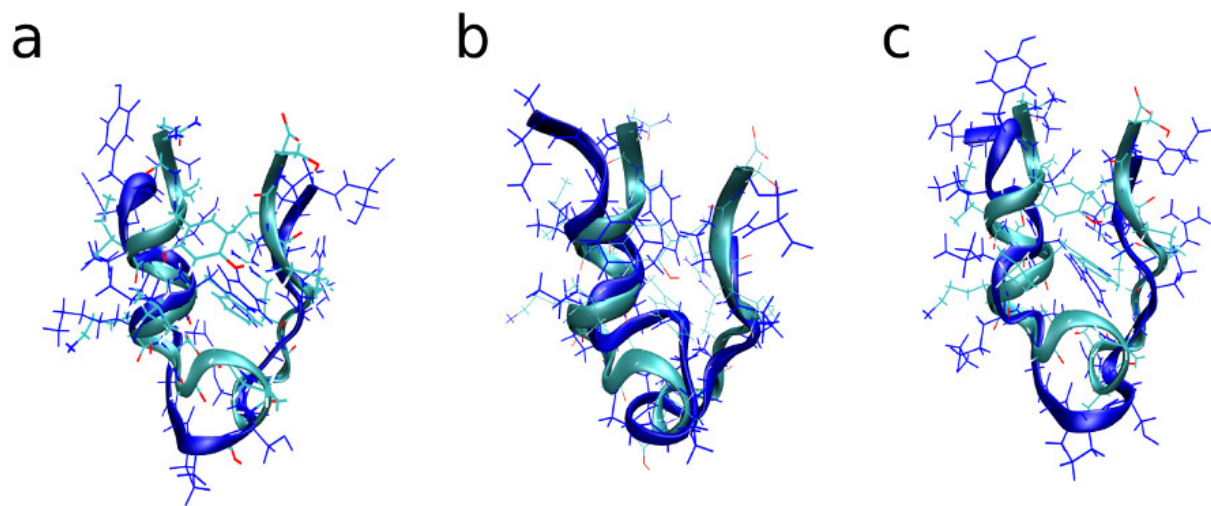

**Fig. 7S** Overlay of final structures with NMR-solution structure of Neidigh *et al.* (PDB: 1L2Y) (cyan). *Method<sub>a</sub>* (a), *Method<sub>b</sub>* (b) and *Method<sub>c</sub>* (c) (blue).

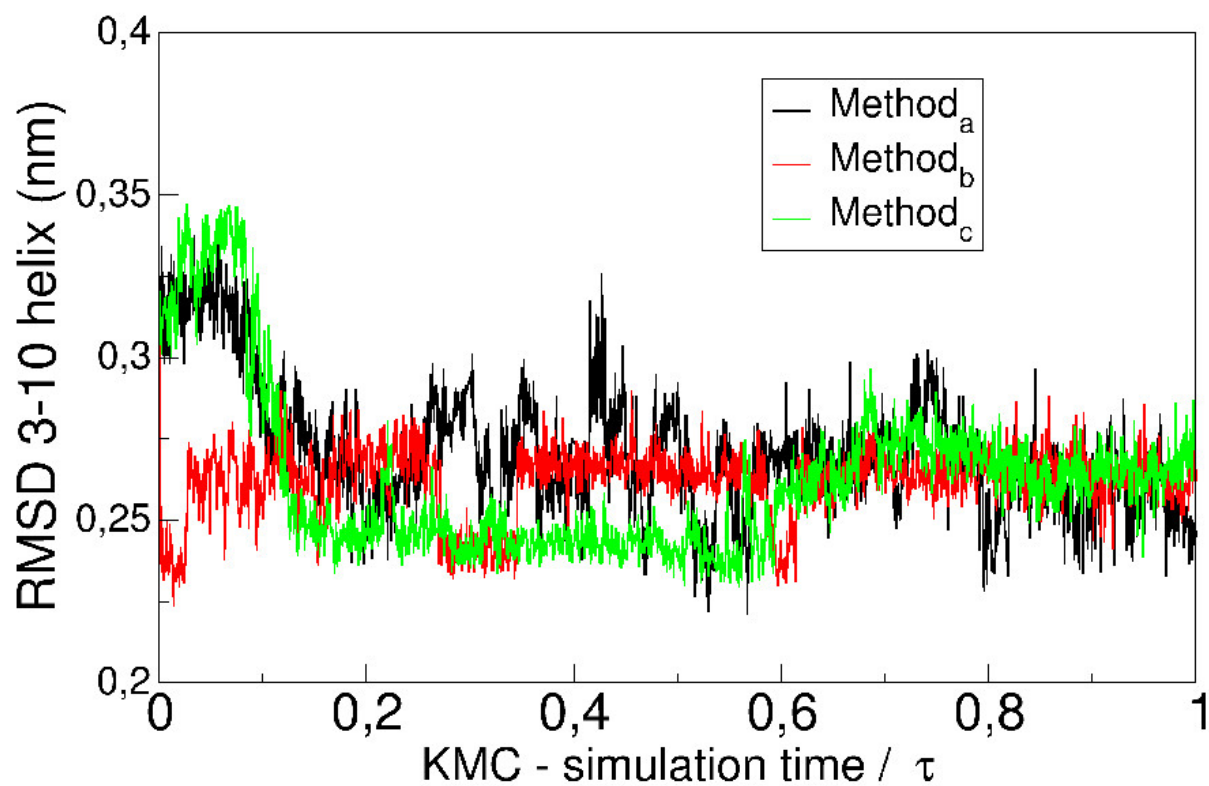

**Fig. 8S**  $RMSD_{3-10}$  helix to the native structure of TrpCage from simulations with the three implemented methods (a-c) as function of normalized simulation time.

## 1 Determination of friction coefficient

For the determination of the friction coefficient  $\gamma$ , we implemented an algorithm, which follows a sequence of virtual events generated randomly and updates the time according to the Bortz-Kalos Lebowitz algorithm. We chose an appropriate range for the activation energies and number of aminoacids. Within this algorithm, we changed the value of the friction coefficient  $\gamma$ , in order to determine *a priori* a good estimate for  $\gamma$ . From different runs with different values for  $\gamma$  ranging from  $1 \text{ ps}^{-1}$  to  $40000 \text{ ps}^{-1}$ , as shown in Figure 9S, where we show the total simulation time as function of KMC-steps. We found that the update in time converges to at a total time of approximately  $1 \mu\text{s}$  at values of  $\gamma$  larger than  $10000 \text{ ps}^{-1}$ . However, we chose a value of  $4000 \text{ ps}^{-1}$ , since we aimed at simulating in a brownian regime, where the protein is mostly decoupled from the solvent. The algorithm consists of following steps :

- Select a number of aminoacids  $N$ , which can perform  $N_2$  events, by solving following equation :

$$N = N_{\max} \xi, \quad \xi \in ]0, 1]; \quad (1)$$

where  $N_{\max} = 4$  and  $\xi$  is a equally distributed random number.

- Select a activation energy  $\Delta G_{ij}^\ddagger$  for each event  $j$  and each aminoacid  $i$ , by :

$$\Delta G_{ij}^\ddagger = \xi \Delta G_{\text{range}} + G_1, \quad \xi \in ]0, 1]; \quad (2)$$

where  $\Delta G_{\text{range}} = 1000 \text{ kJ/mol}$  and  $G_1 = 100 \text{ kJ/mol}$ .

- Select the frequency factor  $\omega_{ij}$  for each event  $j$  and each aminoacid  $i$ , by :

$$\omega_{ij} = \xi \Delta \omega_{\text{range}} + \omega_1, \quad \xi \in ]0, 1]; \quad (3)$$

where  $\Delta \omega_{\text{range}} = 10 \times 10^{-3} \text{ ps}^{-1}$  and  $\omega_1 = 1 \times 10^{-3} \text{ ps}^{-1}$ .

- Continue with

$$v_{ij} = \left[ \left( \frac{\gamma^2}{4} + \omega_b(ij)^2 \right)^{\frac{1}{2}} - \frac{\gamma}{2} \right] \frac{\omega_a(ij)}{2\pi\omega_b(ij)}; \quad (4)$$

where  $\gamma$  is the friction coefficient, and  $\omega_j(i)$   $j = a, b$  are the squared angular frequencies inside each metastable minimum along the process  $i$ .

- **Determination of rate  $r_i$  for process path  $i$** , according to :

$$r_{ij} = v_{ij} \exp \left( \frac{\Delta G_{ij}^\ddagger}{RT} \right); \quad (5)$$

where  $R = k_B N_A$ , where  $k_B$  is Boltzmann's constant,  $N_A$  is Avogadro's number and  $T$  the absolute temperature.

The cumulative sum  $R_j$  is calculated according to :

$$R_j = \sum_{i=1}^N \sum_{j=1}^{N_2} r_{ij} ; \quad (6)$$

until  $j = N$ , where  $N$  is the total number of processes. Using a random number  $\xi \in ]0, 1]$ , one process  $j$  is chosen, solving following equation :

$$R_{j-1} < \xi R_N \leq R_j \quad (7)$$

- **Execution of event  $j$** , update of time, using

$$\Delta t = -\frac{\ln \xi}{R_N} , \quad (8)$$

with a newly generated random number  $\xi \in ]0, 1]$ .

- **Continuation with 1.**

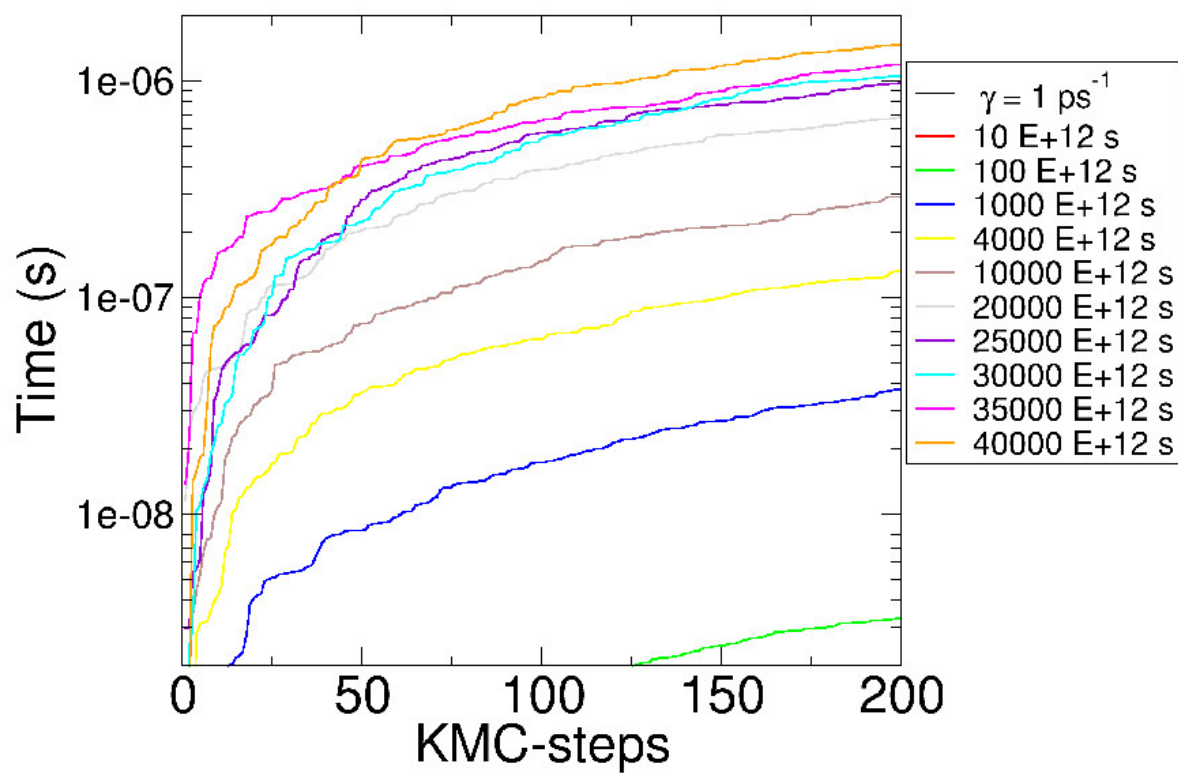

**Fig. 9S** Simulation time as function of KMC-steps from KMC-sampling at different  $\gamma$ -values ranging from  $1 \text{ ps}^{-1}$  to  $40000 \text{ ps}^{-1}$ .
